# Supplementary material
Source: PubMed Central journal article supplement (PMC6348531)
Supplement: SUPPLEMENTARY_MATERIAL.pdf [file SUPPLEMENTARY_MATERIAL.pdf]

## SUPPLEMENTARY MATERIAL

Database: Embase Classic+Embase <1947 to 2016 December 02> , Epub Ahead of Print, In-Process & Other Non-Indexed Citations, Ovid MEDLINE(R) Daily and Ovid MEDLINE(R) <1946 to Present>, PsycINFO <1806 to November Week 4 2016>

Search Strategy:

- 
- 1 dementia.ab,kf,ot,ti.
  - 2 alzheimer disease.ab,kf,ot,ti.
  - 3 alzheimer's disease.ab,kf,ot,ti.
  - 4 alzheimers disease.ab,kf,ot,ti.
  - 5 vascular dementia.ab,kf,ot,ti.
  - 6 VaD.ab,kf,ot,ti.
  - 7 multi-infarct dementia.ab,kf,ot,ti.
  - 8 MID.ab,kf,ot,ti.
  - 9 "cognit\*".ab,kf,ot,ti.
  - 10 1 or 2 or 3 or 4 or 5 or 6 or 7 or 8 or 9
  - 11 iron.ab,kf,ot,ti.
  - 12 heme.ab,kf,ot,ti.
  - 13 haem.ab,kf,ot,ti.
  - 14 ferritin.ab,kf,ot,ti.
  - 15 serum transferrin.ab,kf,ot,ti.
  - 16 11 or 12 or 13 or 14 or 15
  - 17 10 and 16

limit to English language

limit to human

limit to ("young adult (19 to 24 years)" or "adult (19 to 44 years)" or "young adult and adult (19-24 and 19-44)" or "middle age (45 to 64 years)" or "middle aged (45 plus years)" or "all aged (65 and over)" or "aged (80 and over)" or "adulthood <age 18 yrs and older>" or young adulthood <age 18 to 29 yrs> or thirties <age 30 to 39 yrs> or middle age <age 40 to 64 yrs> or "aged <age 65 yrs and older>" or "very old <age 85 yrs and older>") or adulthood <18+ years or (adult <18 to 64 years> or
